# Supplementary material for: Bacterial single-cell RNA sequencing captures biofilm transcriptional heterogeneity and differential responses to immune pressure
Source: PubMed Central journal article supplement — Nat Commun. 2024 Nov 24;15:10184. doi: 10.1038/s41467-024-54581-8 (PMC11585574; doi:10.1038/s41467-024-54581-8), 2024-11-24
Supplement: 41467_2024_54581_MOESM2_ESM.pdf [file 41467_2024_54581_MOESM2_ESM.pdf]

## Description of Additional Supplementary Files:

**Supplementary Data 1:** Differentially expressed genes for biofilm-planktonic cluster 0 (Log<sub>2</sub> fold-change >0 = up in planktonic, Log<sub>2</sub> fold-change <0 = up in biofilm, *p*-values are FDR-adjusted)

**Supplementary Data 2:** Differentially expressed genes for biofilm-planktonic cluster 1 (Log<sub>2</sub> fold-change >0 = up in planktonic, Log<sub>2</sub> fold-change <0 = up in biofilm, *p*-values are FDR-adjusted)

**Supplementary Data 3:** Differentially expressed genes for biofilm-planktonic cluster 2 (Log<sub>2</sub> fold-change >0 = up in planktonic, Log<sub>2</sub> fold-change <0 = up in biofilm, *p*-values are FDR-adjusted)

**Supplementary Data 4:** Differentially expressed genes for biofilm-planktonic cluster 3 (Log<sub>2</sub> fold-change >0 = up in planktonic, Log<sub>2</sub> fold-change <0 = up in biofilm, *p*-values are FDR-adjusted)

**Supplementary Data 5:** Differentially expressed genes for biofilm-planktonic cluster 4 (Log<sub>2</sub> fold-change >0 = up in planktonic, Log<sub>2</sub> fold-change <0 = up in biofilm, *p*-values are FDR-adjusted)

**Supplementary Data 6:** Differentially expressed genes for biofilm-planktonic cluster 5 (Log<sub>2</sub> fold-change >0 = up in planktonic, Log<sub>2</sub> fold-change <0 = up in biofilm, *p*-values are FDR-adjusted)

**Supplementary Data 7:** Differentially expressed genes for biofilm-planktonic cluster 6 (Log<sub>2</sub> fold-change >0 = up in planktonic, Log<sub>2</sub> fold-change <0 = up in biofilm, *p*-values are FDR-adjusted)

**Supplementary Data 8:** Genes positively correlated with the trajectory in Figure 3E

**Supplementary Data 9:** Genes negatively correlated with the trajectory in Figure 3E

**Supplementary Data 10:** Differentially expressed genes for MΦ co-culture cluster 1 (Log<sub>2</sub> fold-change >0 = up in MΦ co-culture, Log<sub>2</sub> fold-change <0 = up PMN/MDSC co-culture, *p*-values are FDR-adjusted)

**Supplementary Data 11:** Differentially expressed genes for MDSC co-culture cluster 1 (Log<sub>2</sub> fold-change >0 = up in MDSC co-culture, Log<sub>2</sub> fold-change <0 = up MΦ/PMN co-culture, *p*-values are FDR-adjusted)

**Supplementary Data 12:** Differentially expressed genes for PMN co-culture cluster 1 (Log<sub>2</sub> fold-change >0 = up in PMN co-culture, Log<sub>2</sub> fold-change <0 = up MΦ/MDSC co-culture, *p*-values are FDR-adjusted)

**Supplementary Data 13:** Round 1 barcoding oligos

**Supplementary Data 14:** Round 2 barcoding oligos

**Supplementary Data 15:** Round 3 barcoding oligos

**Supplementary Data 16:** Forward strand rRNA depletion oligos

**Supplementary Data 17:** Reverse strand rRNA depletion oligos
